# Supplementary material for: Conformational studies of free and Li+ complexed jasplakinolide, a cyclic depsipeptide from the Fijian marine sponge Jaspis splendens
Source: Royal Society of Chemistry journal article supplement (doi:10.1039/b416839a), 2005-01-01
Supplement: b416839a.pdf [file b416839a.pdf]

**Conformational studies of free and Li<sup>+</sup> complexed jasplakinolide, a cyclic  
depsipeptide from the Fijian marine sponge *Jaspis splendens***

*Jioji N. Tabudravu, Linda, A. Morris, Bruce Milne and Marcel Jaspars*

**Table of Contents**

|                  |                                                                                                                                                                                                                              |
|------------------|------------------------------------------------------------------------------------------------------------------------------------------------------------------------------------------------------------------------------|
| <b>Table S1</b>  | <sup>1</sup> H and <sup>13</sup> C NMR data of jasplakinolide in CDCl <sub>3</sub> and CD <sub>3</sub> CN at 400/100 MHz.                                                                                                    |
| <b>Table S2</b>  | <sup>1</sup> H, <sup>13</sup> C NMR, <sup>1</sup> H- <sup>1</sup> H COSY and HMBC data at 400/100 MHz and literature <sup>13</sup> C NMR data <sup>20</sup> of jasplakinolide-Li <sup>+</sup> complex in CD <sub>3</sub> CN. |
| <b>Table S3</b>  | <sup>13</sup> C chemical shift differences between jasplakinolide and jasplakinolide-Li <sup>+</sup> complex in CD <sub>3</sub> CN                                                                                           |
| <b>Table S4</b>  | Restraints used for NOE restrained structure calculation of jasplakinolide in CDCl <sub>3</sub>                                                                                                                              |
| <b>Table S5</b>  | Torsion angle restraints for jasplakinolide in CDCl <sub>3</sub>                                                                                                                                                             |
| <b>Table S6</b>  | Energies (kcal/mol) for jasplakinolide minimum energy structure in CDCl <sub>3</sub>                                                                                                                                         |
| <b>Table S7</b>  | Statistics for 22 lowest energy structures of jasplakinolide in CDCl <sub>3</sub>                                                                                                                                            |
| <b>Table S8</b>  | Restraints used for NOE restrained structure calculation of jasplakinolide in CD <sub>3</sub> CN.                                                                                                                            |
| <b>Table S9</b>  | Torsion angle restraints for jasplakinolide in CD <sub>3</sub> CN                                                                                                                                                            |
| <b>Table S10</b> | Energies (kcal/mol) for jasplakinolide minimum energy structure in CD <sub>3</sub> CN                                                                                                                                        |
| <b>Table S11</b> | Statistics for the 19 lowest energy structures of jasplakinolide in CD <sub>3</sub> CN                                                                                                                                       |
| <b>Table S12</b> | Restraints used for NOE restrained structure calculation of the jasplakinolide-Li <sup>+</sup> complex in CD <sub>3</sub> CN.                                                                                                |
| <b>Table S13</b> | Torsion angle restraints for jasplakinolide-Li <sup>+</sup> complex in CD <sub>3</sub> CN.                                                                                                                                   |
| <b>Table S14</b> | Energies (kcal/mol) for jasplakinolide-Li <sup>+</sup> complex minimum energy structure in CD <sub>3</sub> CN.                                                                                                               |
| <b>Table S15</b> | Statistics for the 35 lowest energy structures of jasplakinolide- Li <sup>+</sup> complex in CD <sub>3</sub> CN.                                                                                                             |

**Table S1.**  $^1\text{H}$  and  $^{13}\text{C}$  NMR data of jasplakinolide in  $\text{CDCl}_3$  and  $\text{CD}_3\text{CN}$  at 400/100 MHz.

| Atom | $^{13}\text{C}$        | $^{13}\text{C}$        | $^1\text{H}$                                          | $^1\text{H}$                                        |
|------|------------------------|------------------------|-------------------------------------------------------|-----------------------------------------------------|
|      | ( $\delta$ /ppm, mult) | ( $\delta$ /ppm, mult) | ( $\delta$ /ppm, mult, $J$ /Hz)                       | ( $\delta$ /ppm, mult, $J$ /Hz)                     |
|      | $\text{CDCl}_3$        | $\text{CD}_3\text{CN}$ | $\text{CDCl}_3$                                       | $\text{CD}_3\text{CN}$                              |
| 1    | 176.1 (s)              | 174.7 (s)              |                                                       |                                                     |
| 2    | 40.8 (d)               | 39.6 (d)               | 2.45 (1H, m)                                          | 2.48 (1H, m)                                        |
| 3    | 41.8 (t)               | 41.8 (t)               | A. 2.32, (dd, 15.6, 16.0)<br>B. 1.85, (1H, d, 15.6)   | A. 2.18 (1H, m)<br>B. 1.89 (1H, m)                  |
| 4    | 134.7 (s)              | 133.0 (s)              |                                                       |                                                     |
| 5    | 128.9 (d)              | 129.4 (d)              | 4.75, (1H, d, 8.4)                                    | 4.79 (1H, d, 8.4)                                   |
| 6    | 30.2 (d)               | 29.2 (d)               | 2.19 (1H, m)                                          | 2.67 (1H, m)                                        |
| 7    | 44.4 (d)               | 43.2 (d)               | A. 1.26 (1H, m)<br>B. 1.05 (1H, m)                    | A. 1.42 (1H, m)<br>B. 1.16 (1H, m)                  |
| 8    | 71.8 (d)               | 70.1 (d)               | 4.57 (1H, m)                                          | 4.66 (1H, m)                                        |
| 10   | 175.4 (s)              | 174.6 (s)              |                                                       |                                                     |
| 11   | 41.2 (t)               | 40.4 (t)               | A. 2.63 (1H, dd, 4.8)<br>B. 2.57 (1H, dd, 5.6, .0)    | 2.67 (1H, dd, 4.4, 4.8)<br>2.59 (1H, dd, 6.8, 7.2)  |
| 12   | 50.0 (d)               | 49.0 (d)               | 5.23 (1H, m)                                          | 5.16 (1H, m)                                        |
| 13   |                        |                        | 7.52 (1H, d, 8.8)                                     | 7.32 (1H, d, 8.8)                                   |
| 14   | 171.8 (s)              | 168.8 (s)              |                                                       |                                                     |
| 15   | 56.5 (d)               | 55.6 (d)               | 5.78 (1H, dd, 6.4, 8.4)                               | 5.64 (1H, dd, 6.4)                                  |
| 17   | 170.0 (s)              | 173.8 (s)              |                                                       |                                                     |
| 18   | 47.0 (t)               | 45.7 (t)               | 4.67 (1H, d, 6.8)                                     | 4.61 (1H, m)                                        |
| 19   |                        |                        | 6.57 (1H, d, 6.4)                                     | 6.62 (1H, d, 6.4)                                   |
| 21   | 21.3 (q)               | 19.1 (q)               | 1.07 (3H, d, 6.8)                                     | 1.01 (3H, d, 6.8)                                   |
| 22   | 19.6 (q)               | 19.1 (q)               | 1.53 (3H, s)                                          | 1.52 (3H, s)                                        |
| 23   | 23.0 (q)               | 21.0 (q)               | 0.77 (3H, d, 6.4)                                     | 0.82 (3H, d, 6.4)                                   |
| 24   | 20.1 (q)               | 19.2 (q)               | 1.02 (3H, d, 6.4)                                     | 1.05 (3H, d, 6.0)                                   |
| 26   | 132.5 (s)              | 132.4 (s)              |                                                       |                                                     |
| 27   | 128.3 (d)              | 127.4 (d)              | 6.90 (1H, d, 8.4)                                     | 6.94 (1H, d, 8.4)                                   |
| 28   | 116.6 (d)              | 116.5 (d)              | 6.62 (1H, d, 8.4)                                     | 6.68 (1H, d, 8.4)                                   |
| 29   | 156.7 (s)              | 156.2 (s)              |                                                       |                                                     |
| 30   | 116.6 (s)              | 116.5 (d)              | 6.62 (1H, d, 8.4)                                     | 6.68 (1H, d, 8.4)                                   |
| 31   | 128.3 (s)              | 127.4 (d)              | 6.90 (1H, d, 8.4)                                     | 6.94 (1H, d, 8.4)                                   |
| 34   | 24.3 (t)               | 23.9 (t)               | A. 3.32 (1H, dd, 6.4, 6.8)<br>B. 3.19, (1H, dd, 10.4) | 3.23 (1H, dd, 6.0, 6.4)<br>3.05 (1H, dd, 9.6, 10.0) |
| 35   |                        |                        | 8.56 (1H, bs)                                         | 9.58 (1H, s)                                        |
| 36   | 110.1 (s)              | 110.3 (s)              |                                                       |                                                     |
| 37   | 111.2 (s)              | 109.3 (s)              |                                                       |                                                     |
| 38   | 128.3 (s)              | 127.5 (s)              |                                                       |                                                     |
| 39   | 119.2 (d)              | 118.5 (d)              | 7.52 (1H, d, 8.4)                                     | 7.57, 1H, d, 8.0)                                   |
| 40   | 121.2 (d)              | 119.8 (d)              | 7.05 (1H, dd, 3.6, 7.2)                               | 7.03 (1H, dd, 1.2, 7.2)                             |
| 41   | 123.5 (d)              | 122.2 (d)              | 7.09 (1H, dd, 3.6, 6.8)                               | 7.11 (1H, dd, 1.2, 7.1)                             |
| 42   | 111.6 (d)              | 110.8 (d)              | 7.21 (1H, d, 8.0)                                     | 7.29 (1H, d, 8.4)                                   |
| 43   | 137.2 (s)              | 136.6 (s)              |                                                       |                                                     |
| 45   | 31.9 (q)               | 31.0 (q)               | 2.94 (3H, s)                                          | 2.99 (3H, s)                                        |
| 47   | 18.8 (q)               | 17.6 (q)               | 0.68 (3H, d, 6.8)                                     | 0.73 (3H, d, 7.2)                                   |

**Table S2.**  $^1\text{H}$ ,  $^{13}\text{C}$  NMR,  $^1\text{H}$ - $^1\text{H}$  COSY and HMBC data at 400/100 MHz and literature  $^{13}\text{C}$  NMR data<sup>20</sup> of jasplakinolide- $\text{Li}^+$  complex in  $\text{CD}_3\text{CN}$ .

| Atom | $^{13}\text{C}$ (lit)<br>( $\delta$ /ppm,<br>mult) | $^{13}\text{C}$<br>( $\delta$ /ppm,<br>mult) | $^1\text{H}$<br>( $\delta$ /ppm, mult, $J$ /Hz) | COSY ( $^1\text{H} \rightarrow ^1\text{H}$ ) | HMBC ( $^{13}\text{C} \rightarrow ^1\text{H}$ ) |
|------|----------------------------------------------------|----------------------------------------------|-------------------------------------------------|----------------------------------------------|-------------------------------------------------|
| 1    | 177.1 (s)                                          | 175.3 (s)                                    |                                                 |                                              | H-3A, H-3B, H-21, H-47,<br>H-18                 |
| 2    | 40.3 (d)                                           | 39.6 (d)                                     | 2.56 (1H, m)                                    | H-3A, H-3B, H21                              |                                                 |
| 3    | 42.4 (t)                                           | 41.7 (t)                                     | A. 2.16 (1H, m)<br>B. 1.88 (1H, m)              | H-2, H-3B<br>H-2, H-3A                       |                                                 |
| 4    | 134.2 (s)                                          | 132.9 (s)                                    |                                                 |                                              | H-3                                             |
| 5    | 129.7 (d)                                          | 129.5 (d)                                    | 4.82 (1H, dd, 1.2, 9.6)                         | H-6                                          | H-22, H-23                                      |
| 6    | 30.1 (d)                                           | 29.3 (d)                                     | 2.26 (1H, m)                                    | H-5                                          |                                                 |
| 7    | 43.4 (t)                                           | 43.0 (t)                                     | A. 1.47 (1H, m)<br>B. 1.21 (1H, m)              | H-8, H-7B<br>H-8, H-7A                       |                                                 |
| 8    | 72.0 (d)                                           | 70.5 (d)                                     | 4.70 (1H, m)                                    | H-7A, H-7B, H-24                             | H-7, H-24                                       |
| 10   | 173.2 (s)                                          | 171.3 (s)                                    |                                                 |                                              | H-11A, 11B                                      |
| 11   | 41.8 (t)                                           | 40.8 (t)                                     | A. 2.68 (1H, m)<br>B. 2.66 (1H, m)              | H-11B<br>H-11A                               |                                                 |
| 12   | 50.5 (d)                                           | 49.2 (d)                                     | 5.20 (1H, m)                                    | NH-13                                        | H-11A, 11B, H-26/31                             |
| 13   |                                                    |                                              | 7.52 (1H, d, 8.8)                               | H-12                                         |                                                 |
| 14   | 170.4 (s)                                          | 169.3 (s)                                    |                                                 |                                              | H-11A, H11B                                     |
| 15   | 57.2 (d)                                           | 55.8 (d)                                     | 5.59 (1H, dd, 6.8)                              | H-34A, H-34B                                 |                                                 |
| 17   | 174.5 (s)                                          | 173.7 (s)                                    |                                                 |                                              | H-34A, H-34B, H-15                              |
| 18   | 46.8 (d)                                           | 45.8 (d)                                     | 4.62 (1H, m)                                    | H-47                                         |                                                 |
| 19   |                                                    |                                              | 7.44 (1H, Bs)                                   |                                              |                                                 |
| 21   | 19.3 (q)                                           | 19.0 (q)                                     | 1.03 (3H, d, 6.8)                               | H-1                                          |                                                 |
| 22   | 18.9 (q)                                           | 17.6 (q)                                     | 1.54 (3H, s)                                    |                                              |                                                 |
| 23   | 22.0 (q)                                           | 21.0 (q)                                     | 0.82 (3H, d, 6.8)                               |                                              |                                                 |
| 24   | 19.8 (q)                                           | 19.0 (q)                                     | 1.05 (3H, d, 6.0)                               | H-8                                          |                                                 |
| 26   | 132.5 (s)                                          | 132.0 (s)                                    |                                                 |                                              |                                                 |
| 27   | 128.3 (d)                                          | 127.4 (d)                                    | 6.93 (1H, d, 8.4)                               |                                              |                                                 |
| 28   | 116.3 (d)                                          | 115.4 (d)                                    | 6.73 (1H, d, 8.4)                               |                                              |                                                 |
| 29   | 157.4 (s)                                          | 156.5 (s)                                    |                                                 |                                              | H-28/30, H-27/31                                |
| 30   | 116.3 (d)                                          | 115.4 (d)                                    | 6.73 (1H, d, 8.4)                               |                                              |                                                 |
| 31   | 128.3 (d)                                          | 127.4 (d)                                    | 6.93 (1H, d, 8.4)                               |                                              |                                                 |
| 34   | 25.3 (t)                                           | 28.9 (t)                                     | A. 3.24 (1H, dd, 6.8)<br>B. 3.06 (1H, dd 6.8)   | H-15, H-34B<br>H-34A, H-15                   |                                                 |
| 35   |                                                    |                                              | 9.80 (1H, s)                                    |                                              |                                                 |
| 36   | 109.9 (s)                                          | 109.9 (s)                                    |                                                 |                                              |                                                 |
| 37   | 110.3 (s)                                          | 109.4 (s)                                    |                                                 |                                              |                                                 |
| 38   | 128.3 (s)                                          | 127.4 (s)                                    |                                                 |                                              |                                                 |
| 39   | 119.4 (d)                                          | 118.5 (d)                                    | 7.57 (1H, 7.6)                                  | H-41                                         | H-41                                            |
| 40   | 120.5 (d)                                          | 119.7 (d)                                    | 7.01 (1H, dd, 1.2, 7.2)                         | H41                                          |                                                 |
| 41   | 122.8 (d)                                          | 122.1 (d)                                    | 7.10 (1H, dd, 1.2, 7.2)                         | H-42, H-39, H40                              |                                                 |
| 42   | 111.7 (d)                                          | 110.9 (d)                                    | 7.34 (1H, d, 8.4)                               | H-41                                         |                                                 |
| 43   | 137.4 (s)                                          | 136.6 (s)                                    |                                                 |                                              | H-41, H-39                                      |
| 45   | 32.5 (q)                                           | 31.0 (q)                                     | 3.02 (3H, s)                                    |                                              | H-34A, H-34B                                    |
| 47   | 18.5 (q)                                           | 17.5 (q)                                     | 0.80 (3H, d, 6.8)                               | H-18                                         | H-18                                            |

**Table S3**  $^{13}\text{C}$  chemical shift differences between Jasplakinolide and the jasplakinolide- $\text{Li}^+$  complex in  $\text{CD}_3\text{CN}$ .

| Carbon # | jasplakinolide<br>$\delta/\text{ppm}$ | jasplakinolide-Li<br>$\delta/\text{ppm}$ | Difference<br>$\Delta\delta/\text{ppm}$ |
|----------|---------------------------------------|------------------------------------------|-----------------------------------------|
| 1        | 174.7                                 | 175.3                                    | 0.6                                     |
| 2        | 39.6                                  | 39.6                                     | 0                                       |
| 3        | 41.8                                  | 41.7                                     | -0.1                                    |
| 4        | 133                                   | 132.9                                    | -0.1                                    |
| 5        | 129.4                                 | 129.5                                    | 0.1                                     |
| 6        | 29.2                                  | 29.3                                     | 0.1                                     |
| 7        | 43.2                                  | 43.0                                     | -0.2                                    |
| 8        | 70.1                                  | 70.5                                     | 0.4                                     |
| 10       | 174.6                                 | 171.3                                    | -3.3                                    |
| 11       | 40.4                                  | 40.8                                     | 0.4                                     |
| 12       | 49                                    | 49.2                                     | 0.2                                     |
| 14       | 168.8                                 | 169.3                                    | 0.5                                     |
| 15       | 55.6                                  | 55.8                                     | 0.2                                     |
| 17       | 173.8                                 | 173.7                                    | -0.1                                    |
| 18       | 45.7                                  | 45.8                                     | 0.1                                     |
| 21       | 19.1                                  | 19.0                                     | -0.1                                    |
| 22       | 19.1                                  | 17.6                                     | -1.5                                    |
| 23       | 21.0                                  | 21.0                                     | 0                                       |
| 24       | 19.2                                  | 19.0                                     | -0.2                                    |
| 26       | 132.4                                 | 132.0                                    | -0.4                                    |
| 27       | 127.4                                 | 127.4                                    | 0                                       |
| 28       | 116.5                                 | 115.4                                    | -1.1                                    |
| 29       | 156.2                                 | 156.5                                    | 0.3                                     |
| 30       | 116.5                                 | 115.4                                    | -1.1                                    |
| 31       | 127.4                                 | 127.4                                    | 0                                       |
| 34       | 23.9                                  | 28.9                                     | 5                                       |
| 36       | 110.3                                 | 109.9                                    | -0.4                                    |
| 37       | 109.3                                 | 109.4                                    | 0.1                                     |
| 38       | 127.5                                 | 127.4                                    | -0.1                                    |
| 39       | 118.5                                 | 118.5                                    | 0                                       |
| 40       | 119.8                                 | 119.7                                    | -0.1                                    |
| 41       | 122.2                                 | 122.1                                    | -0.1                                    |
| 42       | 110.8                                 | 110.9                                    | 0.1                                     |
| 43       | 136.6                                 | 136.6                                    | 0                                       |
| 45       | 31.0                                  | 31.0                                     | 0                                       |
| 47       | 17.6                                  | 17.5                                     | -0.1                                    |

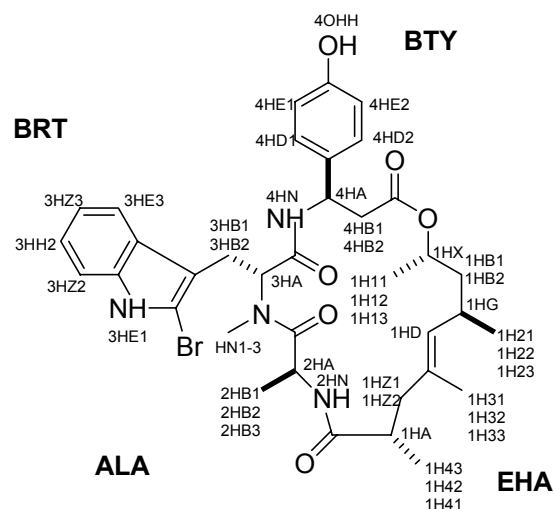

### Structure numbering used for restraints

**Table S4** Restraints used for NOE restrained structure calculation of jaspalaginolide in CDCl<sub>3</sub>.

| res | atom | res | atom | NOE (Å) |
|-----|------|-----|------|---------|
| 1   | H1#  | 3   | HN#  | 6.000   |
| 1   | H3#  | 1   | H1#  | 6.000   |
| 1   | H3#  | 1   | H2#  | 6.000   |
| 1   | H4#  | 1   | HB#  | 5.500   |
| 1   | HA   | 1   | HZ2  | 3.500   |
| 1   | HA   | 1   | H3#  | 5.500   |
| 1   | HA   | 1   | H4#  | 4.000   |
| 1   | HA   | 1   | H1#  | 5.500   |
| 1   | HB#  | 1   | H4#  | 4.000   |
| 1   | HB#  | 1   | H1#  | 5.500   |
| 1   | HB#  | 1   | H2#  | 5.500   |
| 1   | HD   | 1   | HX   | 5.000   |
| 1   | HD   | 1   | HA   | 2.500   |
| 1   | HD   | 1   | HZ1  | 3.500   |
| 1   | HD   | 1   | HG   | 5.00    |
| 1   | HD   | 1   | HZ2  | 5.000   |
| 1   | HD   | 1   | H3#  | 5.500   |
| 1   | HD   | 1   | HB#  | 3.500   |
| 1   | HD   | 1   | H4#  | 5.500   |
| 1   | HD   | 1   | H2#  | 4.000   |
| 1   | HG   | 1   | H3#  | 4.000   |
| 1   | HG   | 1   | HB#  | 5.000   |
| 1   | HG   | 1   | H4#  | 4.000   |
| 1   | HG   | 1   | H1#  | 4.000   |
| 1   | HG   | 1   | H2#  | 4.000   |
| 1   | HX   | 1   | HG   | 3.500   |

|   |     |   |     |       |
|---|-----|---|-----|-------|
| 1 | HX  | 1 | H3# | 5.500 |
| 1 | HX  | 1 | HB# | 3.500 |
| 1 | HX  | 1 | H4# | 4.000 |
| 1 | HX  | 1 | H1# | 3.000 |
| 1 | HX  | 1 | H2# | 5.500 |
| 1 | HZ1 | 1 | HZ2 | 2.500 |
| 1 | HZ1 | 1 | H3# | 4.000 |
| 1 | HZ1 | 1 | H4# | 5.500 |
| 1 | HZ2 | 1 | H3# | 5.500 |
| 1 | HZ2 | 1 | H4# | 4.000 |
| 2 | HA  | 2 | HN  | 3.500 |
| 2 | HA  | 2 | HB# | 4.000 |
| 2 | HA  | 3 | HN# | 3.000 |
| 2 | HB# | 3 | HN# | 4.500 |
| 2 | HN  | 1 | HA  | 3.500 |
| 2 | HN  | 1 | HZ1 | 5.000 |
| 2 | HN  | 1 | HZ2 | 5.000 |
| 2 | HN  | 1 | H4# | 5.500 |
| 2 | HN  | 2 | HB# | 4.000 |
| 3 | HA  | 3 | HB1 | 3.500 |
| 3 | HA  | 3 | HB2 | 3.500 |
| 3 | HA  | 3 | HN# | 5.500 |
| 3 | HB1 | 3 | HB2 | 2.500 |
| 3 | HB1 | 3 | HN# | 4.000 |
| 3 | HB2 | 3 | HN# | 4.000 |
| 3 | HE1 | 3 | HZ2 | 5.000 |
| 3 | HE3 | 4 | HD# | 3.500 |
| 3 | HE3 | 4 | HA  | 5.000 |
| 3 | HZ2 | 3 | HH2 | 2.500 |
| 4 | HA  | 4 | HB# | 2.500 |
| 4 | HB1 | 4 | HB2 | 2.500 |
| 4 | HD# | 1 | HB# | 5.000 |
| 4 | HD# | 3 | HA  | 5.000 |
| 4 | HD# | 4 | HE# | 2.500 |
| 4 | HD# | 4 | HA  | 3.500 |
| 4 | HD# | 4 | HB# | 3.500 |
| 4 | HE# | 3 | HA  | 5.000 |
| 4 | HN  | 3 | HA  | 3.500 |
| 4 | HN  | 3 | HB1 | 5.000 |
| 4 | HN  | 3 | HB2 | 5.000 |
| 4 | HN  | 3 | HN# | 4.000 |
| 4 | HN  | 4 | HE# | 5.000 |
| 4 | HN  | 4 | HB# | 5.000 |

**Table S5** Torsion angle restraints for jasplakinolide in CDCl<sub>3</sub>

|                | <i>J</i> /Hz | Angle (deg.) |
|----------------|--------------|--------------|
| 2HN-2N-2CA-2HA | 6.8          | 140 ± 30     |
| 4HN-4N-4CA-4HA | 7.6          | 145 ± 30     |

**Table S6** Energies (kcal/mol) for jasplakinolide minimum energy structure in CDCl<sub>3</sub>

| $E_{\text{total}}$ | $E_{\text{bonds}}$ | $E_{\text{angle}}$ | $E_{\text{improper}}$ | $E_{\text{van der Waals}}$ | $E_{\text{nOe}}$ |
|--------------------|--------------------|--------------------|-----------------------|----------------------------|------------------|
| 1.45597            | 0.140928           | 0.898113           | 0.194131              | 0.194131                   | 0.221675         |

**Table S7** Statistics for 22 lowest energy structures of jasplakinolide in  $\text{CDCl}_3$ 

| Res# name | Average global displacements |       |         | Average local RMSDs | Average local displacements |       |         |
|-----------|------------------------------|-------|---------|---------------------|-----------------------------|-------|---------|
|           | BB                           | heavy | heavysc |                     | BB                          | heavy | heavysc |
| 1 EHA     | 0.22                         | 0.41  | 0.38    | 0.00                | 0.00                        | 0.00  | 0.00    |
| 2 ALA     | 0.16                         | 0.19  | 0.24    | 0.15                | 0.15                        | 0.18  | 0.20    |
| 3 BRT     | 0.10                         | 0.65  | 0.74    | 0.07                | 0.05                        | 0.58  | 0.67    |
| 4 BTY     | 0.11                         | 0.80  | 0.98    | 0.00                | 0.00                        | 0.00  | 0.00    |

**Table S8** Restraints used for NOE restrained structure calculation of jasplakinolide in  $\text{CD}_3\text{CN}$ .

| atom | res | atom | res | NOE (Å) |
|------|-----|------|-----|---------|
| 4    | HD# | 4    | HE# | 2.500   |
| 3    | HE3 | 3    | HZ3 | 3.500   |
| 3    | HA  | 3    | HE3 | 3.500   |
| 3    | HA  | 4    | HN  | 3.500   |
| 3    | HA  | 4    | HD# | 5.000   |
| 4    | HA  | 4    | HN  | 5.000   |
| 4    | HA  | 4    | HD# | 3.500   |
| 2    | HA  | 2    | HN  | 5.000   |
| 3    | HB1 | 3    | HE3 | 5.000   |
| 3    | HN# | 3    | HE3 | 5.500   |
| 3    | HN# | 4    | HN  | 5.500   |
| 4    | HB2 | 4    | HN  | 5.000   |
| 4    | HB2 | 4    | HD# | 3.500   |
| 1    | HA  | 2    | HN  | 2.500   |
| 1    | H3# | 2    | HN  | 5.500   |
| 1    | H1# | 4    | HN  | 5.500   |
| 1    | H1# | 4    | HD# | 5.500   |
| 1    | H1# | 4    | HE# | 5.500   |
| 1    | H4# | 2    | HN  | 5.500   |
| 2    | HB# | 2    | HN  | 5.500   |
| 3    | HA  | 3    | HB1 | 3.500   |
| 3    | HA  | 3    | HB2 | 3.500   |
| 3    | HA  | 1    | H4# | 5.500   |
| 4    | HA  | 1    | H4# | 5.500   |
| 1    | HD  | 3    | HN# | 5.500   |
| 2    | HA  | 3    | HN# | 3.000   |
| 1    | HA  | 1    | HD  | 3.500   |
| 1    | HZ1 | 1    | HD  | 5.000   |
| 1    | HX  | 1    | HG  | 5.000   |
| 1    | HZ2 | 1    | HD  | 5.000   |
| 1    | H3# | 1    | HD  | 5.500   |
| 1    | H3# | 1    | HX  | 5.500   |
| 1    | HB1 | 1    | HD  | 3.500   |
| 1    | HX  | 1    | HB1 | 3.500   |
| 1    | HB2 | 1    | HD  | 5.000   |
| 1    | HX  | 1    | HB2 | 5.000   |

|   |     |   |     |       |
|---|-----|---|-----|-------|
| 1 | HD  | 1 | H1# | 5.500 |
| 1 | HX  | 1 | H1# | 4.000 |
| 2 | HA  | 1 | H4# | 5.500 |
| 1 | H2# | 1 | HD  | 4.000 |
| 1 | H2# | 1 | HX  | 4.000 |
| 2 | HA  | 2 | HB# | 4.000 |
| 3 | HB1 | 3 | HB2 | 2.500 |
| 4 | HB1 | 4 | HB2 | 2.500 |
| 4 | HB1 | 1 | HG  | 5.000 |
| 1 | HA  | 1 | HZ1 | 5.000 |
| 1 | HA  | 1 | HZ2 | 5.000 |
| 1 | HZ1 | 1 | HZ2 | 2.500 |
| 1 | HZ1 | 1 | H3# | 5.500 |
| 1 | HG  | 1 | H3# | 4.000 |
| 1 | HZ2 | 1 | H3# | 5.500 |
| 1 | HG  | 1 | HB1 | 5.000 |
| 1 | HG  | 1 | HB2 | 5.000 |
| 4 | HB2 | 1 | H1# | 5.500 |
| 1 | HG  | 1 | H1# | 5.500 |
| 1 | HB1 | 1 | HB2 | 2.500 |
| 1 | HA  | 1 | H4# | 4.000 |
| 1 | HZ1 | 1 | H4# | 5.500 |
| 1 | HZ2 | 1 | H4# | 4.000 |
| 1 | H3# | 1 | H1# | 6.000 |
| 1 | HB1 | 1 | H1# | 5.500 |
| 3 | HN# | 2 | HB# | 4.500 |
| 1 | HG  | 1 | H2# | 4.000 |
| 1 | H3# | 1 | H2# | 6.000 |
| 1 | HB1 | 1 | H2# | 5.500 |
| 1 | HB2 | 1 | H2# | 4.000 |

**Table S9** Torsion angle restraints for jasplakinolide in CD<sub>3</sub>CN.

|                | <i>J</i> /Hz | Angle (deg.) |
|----------------|--------------|--------------|
| 2HN-2N-2CA-2HA | 7.2          | 142 ± 20     |
| 4HN-4N-4CA-4HA | 8.8          | 152 ± 20     |

**Table S10** Energies (kcal/mol) for jasplakinolide minimum energy structure in CD<sub>3</sub>CN.

| <i>E</i> <sub>total</sub> | <i>E</i> <sub>bonds</sub> | <i>E</i> <sub>angle</sub> | <i>E</i> <sub>improper</sub> | <i>E</i> <sub>van der Waals</sub> | <i>E</i> <sub>nOe</sub> |
|---------------------------|---------------------------|---------------------------|------------------------------|-----------------------------------|-------------------------|
| 1.25941                   | 0.122797                  | 0.898113                  | 0.830242                     | 0.189806                          | 0.109872                |



**Table S11** Statistics for 22 lowest energy structures of jasplakinolide in CD<sub>3</sub>CN.

| Average global displacements |      |       |         | Average local RMSDs | Average local displacements |       |         |
|------------------------------|------|-------|---------|---------------------|-----------------------------|-------|---------|
| Res# name                    | BB   | heavy | heavysc |                     | BB                          | heavy | heavysc |
| 1 EHA                        | 0.10 | 0.83  | 0.93    | 0.00                | 0.00                        | 0.00  | 0.00    |
| 2 ALA                        | 0.06 | 0.07  | 0.08    | 0.04                | 0.03                        | 0.05  | 0.05    |
| 3 BRT                        | 0.06 | 1.68  | 1.94    | 0.10                | 0.06                        | 1.69  | 1.95    |
| 4 BTY                        | 0.17 | 1.02  | 1.19    | 0.00                | 0.00                        | 0.00  | 0.00    |

**Table S12** Restraints used for NOE restrained structure calculation of the jasplakinolide-Li<sup>+</sup> complex in CD<sub>3</sub>CN

| atom | res   | atom | res   | NOE(Å) |
|------|-------|------|-------|--------|
|      | 1 HA  |      | 1 HZ2 | 2.5    |
|      | 1 HA  |      | 1 H4# | 3      |
|      | 1 HD  |      | 1 HA  | 3.5    |
|      | 1 HD  |      | 1 HG  | 3.5    |
|      | 1 HD  |      | 4 HB1 | 3.5    |
|      | 1 HD  |      | 1 HZ2 | 3.5    |
|      | 1 HD  |      | 1 HB1 | 3.5    |
|      | 1 HD  |      | 1 HB2 | 3.5    |
|      | 1 HD  |      | 2 HB# | 5.5    |
|      | 1 HX  |      | 4 HB1 | 3.5    |
|      | 1 HX  |      | 1 HG  | 3.5    |
|      | 1 HX  |      | 1 HB1 | 3.5    |
|      | 1 HX  |      | 1 H2# | 5.5    |
|      | 1 HZ2 |      | 1 HB1 | 5      |
|      | 1 HZ2 |      | 2 HB# | 5.5    |
|      | 2 HA  |      | 3 HN# | 3      |
|      | 2 HA  |      | 1 HA  | 5      |
|      | 2 HA  |      | 2 HB# | 3      |
|      | 3 HA  |      | 3 HB1 | 3.5    |
|      | 3 HA  |      | 3 HB2 | 3.5    |
|      | 3 HA  |      | 3 HN# | 4      |
|      | 3 HA  |      | 1 H3# | 5.5    |
|      | 3 HA  |      | 1 HB1 | 5      |
|      | 3 HB1 |      | 3 HN# | 3      |
|      | 3 HE3 |      | 3 HB1 | 5      |
|      | 3 HE3 |      | 3 HB2 | 3.5    |
|      | 3 HE3 |      | 3 HZ3 | 3.5    |
|      | 3 HE3 |      | 3 HA  | 2.5    |
|      | 3 HN# |      | 1 H1# | 3.5    |
|      | 3 HN# |      | 2 HB# | 3.5    |
|      | 4 HA  |      | 3 HB1 | 5      |
|      | 4 HA  |      | 4 HB1 | 3.5    |
|      | 4 HA  |      | 1 H1# | 4      |
|      | 4 HD# |      | 4 HA  | 3.5    |

|       |       |     |
|-------|-------|-----|
| 4 HD# | 1 HD  | 5   |
| 4 HD# | 2 HA  | 5   |
| 4 HD# | 4 HB1 | 3.5 |
| 4 HD# | 1 HA  | 2.5 |
| 4 HD# | 1 HZ1 | 5   |
| 4 HD# | 1 H4# | 5.5 |
| 4 HD# | 2 HB# | 5.5 |
| 4 HE# | 1 HX  | 5   |
| 4 HE# | 4 HB1 | 5   |
| 4 HE# | 1 H2# | 5.5 |
| 4 HN  | 4 HD# | 3.5 |
| 4 HN  | 3 HA  | 3.5 |
| 4 HN  | 4 HA  | 5   |
| 4 HN  | 4 HB1 | 3.5 |
| 4 HN  | 2 HB2 | 5   |

**Table S13** Torsion angle restraints for the jasplakinolide-Li<sup>+</sup> complex in CD<sub>3</sub>CN.

|                | <i>J</i> /Hz | Angle (deg.) |
|----------------|--------------|--------------|
| 2HN-2N-2CA-2HA | 7.2          | 158 ± 20     |
| 4HN-4N-4CA-4HA | 6.8          | 139 ± 20     |

**Table S14** Energies (kcal/mol) for the jasplakinolide-Li<sup>+</sup> complex minimum energy structure in CD<sub>3</sub>CN.

| <i>E</i> <sub>total</sub> | <i>E</i> <sub>bonds</sub> | <i>E</i> <sub>angle</sub> | <i>E</i> <sub>improper</sub> | <i>E</i> <sub>van der Waals</sub> | <i>E</i> <sub>nOe</sub> |
|---------------------------|---------------------------|---------------------------|------------------------------|-----------------------------------|-------------------------|
| 10.0043                   | 0.625872                  | 1.82149                   | 0.550594                     | 2.77335                           | 4.23295                 |

**Table S15** Statistics for 22 lowest energy structures of the jasplakinolide-Li<sup>+</sup> complex in CD<sub>3</sub>CN.

| Res# name | Average global displacements |       |         | Average local RMSDs | Average local displacements |       |         |
|-----------|------------------------------|-------|---------|---------------------|-----------------------------|-------|---------|
|           | BB                           | heavy | heavysc |                     | BB                          | heavy | heavysc |
| 1 EHA     | 0.08                         | 0.15  | 0.16    | 0.00                | 0.00                        | 0.00  | 0.00    |
| 2 ALA     | 0.06                         | 0.09  | 0.14    | 0.05                | 0.05                        | 0.07  | 0.08    |
| 3 BRT     | 0.05                         | 0.45  | 0.51    | 0.05                | 0.03                        | 0.42  | 0.48    |
| 4 BTY     | 0.08                         | 0.65  | 0.79    | 0.00                | 0.00                        | 0.00  | 0.00    |
